# Supplementary material for: Validation of a LC-MS/MS Method for Quantifying Urinary Nicotine, Six Nicotine Metabolites and the Minor Tobacco Alkaloids—Anatabine and Anabasine—in Smokers' Urine
Source: PLoS One. 2014 Jul 11;9(7):e101816. doi: 10.1371/journal.pone.0101816 (PMC4094486; doi:10.1371/journal.pone.0101816)
Supplement: Data S4 — Accuracy Table 3 . (XLS) [file pone.0101816.s004.xls]

## Sheet: Runs data
	Target	10	20	20	10	20	10	0.5	0.5	20
			Free	Pool	TSV-1
Sample Name	Pool	CotOx_F-Blk	NicOx_F-Blk	OHCot_F-Blk	NorCo_F-Blk	Cot_F-Blk	NorNic_F-Blk	AT_F-Blk	AB_F-Blk	Nic_F-Blk
UF045-012	TSV-1	11.463	20.201	30.145	8.911	27.534	9.491	0.229	0.219	18.577
UF047-012	TSV-1	11.033	19.606	25.963	10.251	23.757	8.716	0.409	0.016	17.101
UF049-012	TSV-1	11.35	21.043	33.491	8.617	26.94	9.884	0.412	0.564	18.364
UF051-012	TSV-1	13.683	20.261	27.124	10.362	27.351	9.559	0.517	0.519	18.733
UF053-012	TSV-1	12.174	22.172	34.957	10.115	28.543	10.258	0.469	0.036	18.677
UF055-012	TSV-1	10.964	19.668	32.632	9.782	26.713	9.424	0.468	0.509	18.487
UF057-012	TSV-1	10.635	22.677	27.187	9.923	25.743	10.017	0.518	0.456	17.605
UF059-012	TSV-1	10.926	20.041	27.849	10.306	25.725	9.242	0.389	0.53	19.06
UF061-012	TSV-1	10.934	19.483	27.943	10.146	27.187	9.308	0.526	0.414	18.751
UF063-012	TSV-1	11.471	19.14	28.299	11.179	26.14	9.486	0.634	0.52	18.864
UF065-012	TSV-1	11.415	lost	27.136	10.66	26.013	10.384	0.471	0.443	19.215
UF067-012	TSV-1	11.174	18.826	26.856	10.606	24.764	9.471	0.412	0.423	17.669
UF069-012	TSV-1	11.554	19.464	31.165	10.015	26.885	9.398	0.573	0.569	19.072
UF071-012	TSV-1	11.159	20.207	28.7	10.035	27.386	9.147	0.655	0.666	18.485
UF073-012	TSV-1	11.001	19.264	29.645	10.361	27.648	9.758	0.573	0.638	17.859
UF075-012	TSV-1	11.34	19.946	28.074	10.23	26.359	9.62	0.719	0.584	18.585
UF077-012	TSV-1	10.907	20.434	32.43	12.842	27.206	9.192	0.558	0.635	17.706
UF079-012	TSV-1	10.85	20.833	32.79	11.582	27.001	8.749	0.341	0.339	17.4
UF081-012	TSV-1	11.505	20.431	32.013	8.709	27.239	9.801	0.556	0.722	18.901
UF083-012	TSV-1	10.996	20.564	31.081	8.922	26.921	9.689	0.46	0.378	19.219
UF085-012	TSV-1	11.315	21.76	28.896	9.764	25.519	9.712	0.321	0.64	17.814
UF087-012	TSV-1	11.528	20.932	28.81	9.267	27.614	10.016	0.233	0.614	17.367
TSV-1	Mean	11.3353	20.3311	29.6903	10.1175	26.6449	9.56009	0.474682	0.474273	18.3414
TSV-1	STDEV	0.621893	0.991402	2.5104	0.964847	1.07441	0.42157	0.126652	0.187417	0.656252
	% CV	5.48633	4.87629	8.45531	9.53642	4.03233	4.40969	26.6814	39.5167	3.57798
	Target	40	40	160	40	160	40	1	1	40
			Free	Pool	TSV-2
Sample Name	Pool	CotOx_F-Blk	NicOx_F-Blk	OHCot_F-Blk	NorCo_F-Blk	Cot_F-Blk	NorNic_F-Blk	AT_F-Blk	AB_F-Blk	Nic_F-Blk
UF045-013	TSV-2	40.334	40.478	185.796	43.039	161.327	38.205	0.845	0.894	39.189
UF047-013	TSV-2	42.316	41.097	160.621	40.477	179.637	36.979	0.946	0.979	38.3
UF049-013	TSV-2	40.95	41.016	166.024	36.612	164.092	39.308	0.944	1.301	39.519
UF051-013	TSV-2	43.159	41.945	165.128	39.763	164.725	41.473	0.962	1.149	39.766
UF053-013	TSV-2	42.576	42.212	213.979	39.983	167.58	41.208	1.096	0.899	39.763
UF055-013	TSV-2	42.034	38.126	168.441	39.82	159.616	37.757	1.091	1.112	39.372
UF057-013	TSV-2	40.875	42.645	176.993	40.783	169.447	40.125	1.076	0.869	38.238
UF059-013	TSV-2		low recovery
UF061-013	TSV-2	41.004	38.978	159.267	40.192	163.029	38.308	1.105	1.015	38.699
UF063-013	TSV-2	41.145	40.701	168.967	44.681	167.327	38.467	0.867	0.993	38.153
UF065-013	TSV-2	42.688	lost	152.084	44.298	168.968	39.5	0.808	0.978	37.975
UF067-013	TSV-2	42.375	38.953	163.323	44.807	157.322	39.269	1.079	1.139	39
UF069-013	TSV-2	40.91	38.174	158.176	37.573	163.052	38.614	0.87	1.13	37.232
UF071-013	TSV-2	41.53	40.902	162.413	33.224	163.91	39.076	0.991	0.843	37.456
UF073-013	TSV-2	40.816	39.022	167.491	40.027	162.619	37.806	0.97	0.974	36.127
UF075-013	TSV-2	39.801	37.746	159.338	40.439	170.744	38.225	0.936	0.675	37.747
UF077-013	TSV-2	40.208	39.93	169.678	45.427	165.737	36.889	1.133	0.809	36.175
UF079-013	TSV-2	40.956	39.049	172.207	41.941	166.579	38.416	1.1	1.001	37.099
UF081-013	TSV-2	41.03	40.951	164.092	36.368	163.617	39.13	0.973	1.279	38.261
UF083-013	TSV-2	41.907	41.192	163.482	37.259	161.52	39.036	1.035	1.011	37.911
UF085-013	TSV-2	41.095	42.21	166.818	38.185	167.324	39.225	0.744	1.199	37.462
UF087-013	TSV-2	41.53	42.727	153.762	38.327	168.585	39.359	0.696	1.132	37.722
TSV-2	Mean	41.3923	40.4027	167.528	40.1536	165.56	38.875	0.965095	1.01814	38.1508
TSV-2	STDEV	0.87862	1.56906	13.0182	3.13602	4.69268	1.15209	0.124619	0.157618	1.05013
	% CV	2.12266	3.88354	7.77079	7.81006	2.83443	2.96358	12.9127	15.481	2.75258
	Target	200	400	800	200	800	200	2	2	400
			Free	Pool	TSV-3
Sample Name	Pool	CotOx_F-Blk	NicOx_F-Blk	OHCot_F-Blk	NorCo_F-Blk	Cot_F-Blk	NorNic_F-Blk	AT_F-Blk	AB_F-Blk	Nic_F-Blk
UF045-014	TSV-3	192.473	406.757	826.33	185.636	811.403	195.742	2.215	1.987	402.284
UF047-014	TSV-3	199.858	378.444	785.595	161.864	778.441	184.866	2.298	2.078	373.834
UF049-014	TSV-3	204.281	402.538	823.113	193.418	872.332	197.138	2.056	2.192	384.025
UF051-014	TSV-3	215.566	413.373	834.118	193.393	847.754	199.867	2.167	1.978	398.635
UF053-014	TSV-3	198.501	423.889	936.526	193.976	819.301	209.647	2.05	2.359	389.194
UF055-014	TSV-3	203.17	413.406	874.241	196.644	757.78	195.856	2.227	1.888	386.524
UF057-014	TSV-3	195.616	437.132	776.501	202.042	814.654	199.521	2.075	2.324	375.647
UF059-014	TSV-3	198.18	362.802	773.839	194.078	799.782	189.333	2.295	2.231	378.295
UF061-014	TSV-3		low recovery
UF063-014	TSV-3	199.393	390.576	807.824	208.688	800.688	196.976	2.072	2.256	378.663
UF065-014	TSV-3	198.971	lost	843.178	190.305	743.134	194.151	2.068	1.851	382.836
UF067-014	TSV-3	198.778	392.778	909.1	195.386	776.383	203.293	2.385	2.202	376.674
UF069-014	TSV-3	202.371	382.083	789.154	181.049	768.068	197.597	2.05	2.198	388.746
UF071-014	TSV-3	209.978	390.89	757.62	194.05	805.982	188.721	2.383	2.055	375.144
UF073-014	TSV-3	194.858	391.867	853.167	214.761	794.944	192.975	2.257	2.272	392.35
UF075-014	TSV-3	197.549	383.644	801.376	196.343	804.122	200.826	2.596	2.299	385.11
UF077-014	TSV-3	194.128	397.867	816.668	231.253	808.291	187.9	1.945	2.235	386.598
UF079-014	TSV-3	198.035	395.969	801.663	195.965	793.063	200.049	2.177	2.33	386.616
UF081-014	TSV-3	199.614	405.211	789.725	176.311	761.782	203.769	2.715	2.042	390.544
UF083-014	TSV-3	205.583	411.533	799.575	175.562	791.838	202.945	2.259	2.084	394.692
UF085-014	TSV-3	205.257	417.409	805.759	188.405	793.575	191.659	2.285	2.083	386.463
UF087-014	TSV-3	211.626	416.44	810.467	181.24	822.843	204.809	2.027	2.049	396.404
TSV-3	Mean	201.133	400.73	819.788	192.875	798.389	197.03	2.21914	2.14252	386.156
TSV-3	STDEV	5.90847	17.5181	44.0817	14.5304	29.597	6.29945	0.190701	0.14717	7.98736
	% CV	2.9376	4.37153	5.37721	7.53359	3.70709	3.1972	8.59346	6.86899	2.06843
	Target	100	100	2000	100	2000	100	5	5	1200
			Free	Pool	TSV-4
Sample Name	Pool	CotOx_F-Blk	NicOx_F-Blk	OHCot_F-Blk	NorCo_F-Blk	Cot_F-Blk	NorNic_F-Blk	AT_F-Blk	AB_F-Blk	Nic_F-Blk
UF045-015	TSV-4	100.51	101.306	1901.58	100.583	2030.05	102.246	5.613	5.557	1163.6
UF047-015	TSV-4	102.88	99.558	1877.41	102.173	2065.8	96.527	5.681	5.299	1146.29
UF049-015	TSV-4	103.096	100.391	2005.37	109.912	2083.93	101.089	5.652	5.155	1141.11
UF051-015	TSV-4	102.625	102.045	2050.67	101.811	1928.24	101.174	5.554	5.26	1132.26
UF053-015	TSV-4	88.153	104.213	2191.04	99.669	1895.86	105.354	4.994	5.392	1122.79
UF055-015	TSV-4	100.699	98.143	2005.04	103.976	1881.46	97.247	5.804	5.156	1154.67
UF057-015	TSV-4	100.144	105.555	2026.03	108.748	2056.3	102.748	5.548	5.856	1139.32
UF059-015	TSV-4	104.457	95.759	2062.8	99.457	1991.32	100.607	5.339	5.18	1132.88
UF061-015	TSV-4	101.074	100.06	2069.78	107.612	2041.19	96.568	5.296	5.218	1154.41
UF063-015	TSV-4	101.108	96.745	2089.52	115.648	2027.14	102.112	5.907	5.491	1154.85
UF065-015	TSV-4	99.642	lost	1942.29	108.205	1891.17	96.794	5.555	4.872	1156.21
UF067-015	TSV-4	97.707	94.701	1956.87	99.448	1899.3	97.84	5.83	4.922	1143.99
UF069-015	TSV-4	97.751	90.548	1992.83	99.063	1854.73	98.73	5.057	5.032	1124.78
UF071-015	TSV-4	100.977	96.922	2181.12	105.929	2038.88	90.723	5.389	5.92	1125.37
UF073-015	TSV-4	96.092	94.978	2058.26	111.918	1949.83	97.913	6.026	5.177	1145.61
UF075-015	TSV-4	97.481	98.389	1906.48	103.146	2065.37	103.513	5.373	5.147	1191.6
UF077-015	TSV-4	96.384	98.237	2079.07	129.083	1937.37	100.571	5.339	5.633	1173.88
UF079-015	TSV-4	101.345	102.234	2212.36	96.45	2042.4	98.954	6.057	4.861	1177.25
UF081-015	TSV-4	98.411	101.251	1967.8	93.304	1938.74	103.224	5.169	5.417	1170.86
UF083-015	TSV-4	100.415	97.908	1990.31	93.371	1972.92	96.792	5.851	5.003	1168.17
UF085-015	TSV-4	105.111	106.17	1967.37	97.796	1931.35	96.467	5.25	5.349	1136.71
UF087-015	TSV-4	103.61	100.352	1928.65	99.612	2008.3	101.545	5.057	5.483	1152.08
TSV-4	Mean	99.9851	99.3079	2021.03	103.951	1978.71	99.4881	5.5155	5.29	1150.39
TSV-4	STDEV	3.63766	3.76669	92.6923	8.0669	70.5111	3.31375	0.315564	0.288233	18.4232
	% CV	3.63821	3.79294	4.58639	7.76032	3.56349	3.3308	5.7214	5.44864	1.60146
	Target	400	400	4000	400	4000	400	25	25	2000
			Free	Pool	TSV-5
Sample Name	Pool	CotOx_F-Blk	NicOx_F-Blk	OHCot_F-Blk	NorCo_F-Blk	Cot_F-Blk	NorNic_F-Blk	AT_F-Blk	AB_F-Blk	Nic_F-Blk
UF045-016	TSV-5	383.24	413.761	3860.11	379.24	3858.88	384.854	24.245	26.095	1954.47
UF047-016	TSV-5	395.455	387.538	3781.96	426.228	4088.73	380.363	26.11	25.047	1952.03
UF049-016	TSV-5	394.214	410.116	3830.1	392.612	3984.25	392.308	27.402	26.325	1858.05
UF051-016	TSV-5	411.098	418.332	3999.15	382.939	3796.28	398.199	24.747	25.31	1847.4
UF053-016	TSV-5	436.572	417.625	4374.53	388.009	3681.92	397.917	22.664	23.565	1836.83
UF055-016	TSV-5	398.151	410.826	4118.59	429.248	3706.14	379.146	26.265	24.239	1894.13
UF057-016	TSV-5	395.916	455.273	4086.64	389.285	3837.57	390.953	25.125	24.991	1896.98
UF059-016	TSV-5	393.997	362.034	3784.42	413.433	3997.86	401.901	26.227	24.829	1957.14
UF061-016	TSV-5	405.716	392.396	4060.46	408.21	3882.8	397.419	23.548	25.589	1920.94
UF063-016	TSV-5	390.237	390.383	4107.52	442.605	3737.11	400.215	25.676	24.498	1883.09
UF065-016	TSV-5	410.786	lost	4116.55	422.893	3898.51	424.679	26.223	27.076	1985.48
UF067-016	TSV-5	404.506	375.237	4315.74	398.333	3907.97	398.786	24.98	24.084	1920.85
UF069-016	TSV-5	381.661	376.955	3998.33	377.42	3756.62	390.641	24.474	24.288	1890.29
UF071-016	TSV-5	417.452	391.027	4027.6	386.264	3945.2	379.383	25.582	24.402	1917.18
UF073-016	TSV-5	396.825	395.308	3811.42	429.015	3829.95	388.7	25.885	23.407	1942.82
UF075-016	TSV-5	381.781	391.279	3919.19	398.027	3726.24	398.479	25.212	25.978	1931.3
UF077-016	TSV-5	386.663	382.161	4020.26	449.528	3901.12	385.373	24.934	23.36	1913.57
UF079-016	TSV-5	392.428	399.372	4208.68	397.153	4022.45	386.178	26.161	24.367	2017
UF081-016	TSV-5	394.574	414.029	3753.6	355.558	4038.69	381.926	25.613	23.057	1932.07
UF083-016	TSV-5	403.155	412.514	3966.16	369.435	3857.52	408.661	24.453	24.832	1932.44
UF085-016	TSV-5	408.923	410.234	3905.89	393.996	3727.6	396.268	25.009	24.705	1915.32
UF087-016	TSV-5	410.14	399.447	3830.86	420.154	4009.93	398.62	26.497	25.473	1950.66
TSV-5	Mean	399.704	400.278	3994.44	402.254	3872.42	393.68	25.3196	24.7962	1920.46
TSV-5	STDEV	13.0101	19.945	171.582	24.3131	119.42	10.7036	1.06323	1.02628	42.9381
	% CV	3.25492	4.98278	4.29551	6.04423	3.08384	2.71885	4.19923	4.13884	2.23583
			Free	Pool	TSV-blk
Sample Name	Pool	CotOx_F-Blk	NicOx_F-Blk	OHCot_F-Blk	NorCo_F-Blk	Cot_F-Blk	NorNic_F-Blk	AT_F-Blk	AB_F-Blk	Nic_F-Blk
UF045-011	TSV-blk	1.495	0.348	8.94	0.524	6.597	0	0	0	-0.25
UF047-011	TSV-blk	1.305	0.439	9.374	0.152	5.34	-0.2	0	0	-1.344
UF049-011	TSV-blk	1.425	0.486	9.155	0.192	7.199	-0.1	0	0	-0.476
UF051-011	TSV-blk	2.016	0.329	10.053	0.129	6.999	0	0.005	0	-0.854
UF053-011	TSV-blk	2.008	0.583	8.979	0.201	7.011	0.118	0	0	-0.56
UF055-011	TSV-blk	1.381	0.255	8.574	0.312	6.333	0.204	0	0	-0.961
UF057-011	TSV-blk	1.311	0.493	8.137	0.065	6.037	0.238	0	0	-0.99
UF059-011	TSV-blk	1.028	0.096	8.56	0.166	7.53	-0.13	0	0	0.295
UF061-011	TSV-blk	1.227	0.525	8.674	0.182	8.743	-0.066	0	0	-0.201
UF063-011	TSV-blk	1.374	0.417	8.924	0.067	6.707	-0.13	0	0	-0.182
UF065-011	TSV-blk	1.209	lost	8.677	0.314	7.111	0.103	0	0	-0.369
UF067-011	TSV-blk	1.125	0.427	9.136	0.311	6.452	-0.13	0	0	-0.336
UF069-011	TSV-blk	1.448	0.322	10.051	0.37	7.951	-0.13	0	0	-0.282
UF071-011	TSV-blk	1.37	0.403	7.486	0.32	6.852	0.118	0	0	-0.228
UF073-011	TSV-blk	1.298	0.4	8.841	0.335	6.632	0.198	0	0	-0.495
UF075-011	TSV-blk	1.424	0.467	9.534	0.276	7.692	0.214	0.107	0	-0.495
UF077-011	TSV-blk	0.951	0.408	7.66	0.296	5.501	-0.13	0	0.176	-0.495
UF079-011	TSV-blk	1.172	0.335	7.586	0.269	7.287	-0.13	0	0.082	-0.495
UF081-011	TSV-blk	1.278	0.342	7.622	0.224	6.526	-0.065	0	0	-0.495
UF083-011	TSV-blk	1.261	0.346	9.593	0.229	6.732	-0.13	0	0	-0.495
UF085-011	TSV-blk	1.059	0.505	8.733	0.101	6.738	-0.017	0	0.069	-0.495
UF087-011	TSV-blk	1.254	0.54	7.554	0.26	7.295	-0.059	0	0	-0.495
TSV-blk	Mean	1.33723	0.403143	8.72014	0.240682	6.87568	-0.0101818	0.00509091	0.0148636	-0.486273
TSV-blk	STDEV	0.259124	0.109648	0.781431	0.108524	0.756859	0.138028	0.0227866	0.0423144	0.333889
	% CV	19.3777	27.1982	8.96122	45.0902	11.0078	-1355.63	447.594	284.684	-68.6629

## Sheet: Runs Summay
Pool	Pool	CotOx	NicOx	OHCot	NorCot	Cot	NorNic	AT (LOD = 0.45)	AB (LOD = 0.6)	Nic
TSV-1	Target	10	20	20	10	20	10	0.5	0.5	20
	Mean	11.3353	20.3311	29.6903	10.1175	26.6449	9.56009	0.474682	0.474273	18.3414
	Blank Subt	1.33723	0.403143	8.72014	0.240682	6.87568	-0.0101818	0.00509091	0.0148636	-0.486273
	Result	9.99809	19.928	20.9701	9.87682	19.7692	9.57027	0.469591	0.459409	18.8277
	STDEV	0.621893	0.991402	2.5104	0.964847	1.07441	0.42157	0.126652	0.187417	0.656252
	% CV	5.48633	4.87629	8.45531	9.53642	4.03233	4.40969	26.6814	39.5167	3.57798
TSV-2	Target	40	40	160	40	160	40	1	1	40
	Mean	41.3923	40.4027	167.528	40.1536	165.56	38.875	0.965095	1.01814	38.1508
	Blank Subt	1.33723	0.403143	8.72014	0.240682	6.87568	-0.0101818	0.00509091	0.0148636	-0.486273
	Result	40.0551	39.9996	158.807	39.9129	158.684	38.8852	0.960004	1.00328	38.637
	STDEV	0.87862	1.56906	13.0182	3.13602	4.69268	1.15209	0.124619	0.157618	1.05013
	% CV	2.12266	3.88354	7.77079	7.81006	2.83443	2.96358	12.9127	15.481	2.75258
TSV-3	Target	200	400	800	200	800	200	2	2	400
	Mean	201.133	400.73	819.788	192.875	798.389	197.03	2.21914	2.14252	386.156
	Blank Subt	1.33723	0.403143	8.72014	0.240682	6.87568	-0.0101818	0.00509091	0.0148636	-0.486273
	Result	199.795	400.327	811.067	192.634	791.513	197.041	2.21405	2.12766	386.642
	STDEV	5.90847	17.5181	44.0817	14.5304	29.597	6.29945	0.190701	0.14717	7.98736
	% CV	2.9376	4.37153	5.37721	7.53359	3.70709	3.1972	8.59346	6.86899	2.06843
TSV-4	Target	100	100	2000	100	2000	100	5	5	1200
	Mean	99.9851	99.3079	2021.03	103.951	1978.71	99.4881	5.5155	5.29	1150.39
	Blank Subt	1.33723	0.403143	8.72014	0.240682	6.87568	-0.0101818	0.00509091	0.0148636	-0.486273
	Result	98.6479	98.9047	2012.31	103.71	1971.84	99.4983	5.51041	5.27514	1150.88
	STDEV	3.63766	3.76669	92.6923	8.0669	70.5111	3.31375	0.315564	0.288233	18.4232
	% CV	3.63821	3.79294	4.58639	7.76032	3.56349	3.3308	5.7214	5.44864	1.60146
TSV-5	Target	400	400	4000	400	4000	400	25	25	2000
	Mean	399.704	400.278	3994.44	402.254	3872.42	393.68	25.3196	24.7962	1920.46
	Blank Subt	1.33723	0.403143	8.72014	0.240682	6.87568	-0.0101818	0.00509091	0.0148636	-0.486273
	Result	398.367	399.875	3985.72	402.013	3865.55	393.691	25.3145	24.7814	1920.94
	STDEV	13.0101	19.945	171.582	24.3131	119.42	10.7036	1.06323	1.02628	42.9381
	% CV	3.25492	4.98278	4.29551	6.04423	3.08384	2.71885	4.19923	4.13884	2.23583
			Free	Pool	TSV-blk
Sample Name	Pool	CotOx_F-Blk	NicOx_F-Blk	OHCot_F-Blk	NorCo_F-Blk	Cot_F-Blk	NorNic_F-Blk	AT_F-Blk	AB_F-Blk	Nic_F-Blk
TSV-blk	Mean	1.33723	0.403143	8.72014	0.240682	6.87568	-0.0101818	0.00509091	0.0148636	-0.486273
TSV-blk	STDEV	0.259124	0.109648	0.781431	0.108524	0.756859	0.138028	0.0227866	0.0423144	0.333889
	% CV	19.3777	27.1982	8.96122	45.0902	11.0078	-1355.63	447.594	284.684	-68.6629

## Sheet: Table 3
	Cotinine N-oxide				Nicotine N-oxide				Hydroxycotine
	Target (Observed Mean)	STDEV (%CV)	% Bias		Target (Observed Mean)	STDEV (%CV)	% Bias		Target (Observed Mean)	STDEV (%CV)	% Bias
Pool	CotOx				NicOx				OHCot
TSV-1	10	0.622			20	0.991			20	2.51
	(10.0)	(5.5)	0.0		(19.93)	-4.9	-0.36		(20.97)	(8.5)	4.9
TSV-2	40	0.878			40	1.569			160	13.02
	(40.1)	(2.1)	0.14		(40.0)	(3.9)	0.0		(158.81)	(7.8)	-0.75
TSV-3	200	5.91			400	17.52			800	44.08
	(199.8)	(2.9)	-0.10		(400.3)	(4.4)	-0.082		(811.1)	(5.4)	1.4
TSV-4	100	3.64			100	3.767			2000	92.69
	(98.6)	(3.6)	-1.4		(98.90)	(3.8)	-1.10		(2012)	(4.6)	0.61
TSV-5	400	13.0			400	19.94			4000	171.6
	(398.4)	(3.3)	-0.41		(399.9)	(5.0)	-0.031		(3986)	(4.3)	-0.36
	Nornicotine				Norcotine				Cotinine
	Target (Observed Mean)	STDEV (%CV)	% Bias		Target (Observed Mean)	STDEV (%CV)	% Bias		Target (Observed Mean)	STDEV (%CV)	% Bias
	NorNic				NorCot				Cot
TSV-1	10	0.421			10	0.965			20	1.07441
	(9.57)	(4.4)	-4.3		(9.877)	(9.5)	-1.2		(19.77)	(4.0)	-1.2
TSV-2	40	1.15			40	3.13602			160	4.69268
	(38.89)	(3.0)	-2.8		(39.91)	(7.8)	-0.22		(158.7)	(2.8)	-0.82
TSV-3	200	6.29			200	14.5304			800	29.597
	(197.04)	(3.2)	-1.5		(192.6)	(7.5)	-3.7		(791.5)	(3.7)	-1.1
TSV-4	100	3.31			100	8.07			2000	70.5111
	(99.50)	(3.3)	-0.50		(103.7)	(7.8)	3.7		(1971.8)	(3.6)	-1.4
TSV-5	400	10.7			400	24.31			4000	119.42
	(393.7)	(2.7)	-1.6		(402.0)	(6.0)	0.50		(3865.5)	(3.1)	-3.4
	Anatabine				Anabasine				Nicotine
	Target (Observed Mean)	STDEV (%CV)	% Bias		Target (Observed Mean)	STDEV (%CV)	% Bias		Target (Observed Mean)	STDEV (%CV)	% Bias
	AT (LOD = 0.45)				AB (LOD = 0.6)				Nic
TSV-1	0.5	0.127			0.5	0.187			20	0.656	-5.9
	(0.47)	(26.7)	-6.1		0.459409	(40.0)	-8.2		(18.83)	(3.6)
TSV-2	1	0.125			1	0.157			40	1.050
	(0.96)	(12.9)	-4.0		1.00328	(15.5)	0.33		(38.64)	(2.8)	-3.4
TSV-3	2	0.191			2	0.147			400	7.99
	(2.21)	(8.6)	10.7		2.12766	(6.9)	6.4		(386.6)	(2.1)	-3.3
TSV-4	5	0.316			5	0.288			1200	18.42
	(5.51)	(5.7)	10.2		5.27514	(5.4)	5.5		(1150.8)	(1.6)	-4.1
TSV-5	25	1.06			25	1.026			2000	42.93
	(25.31)	(4.2)	1.3		24.7814	(4.1)	-0.87		(1920.9)	(2.2)	-4.0
